# Supplementary material
Source: PubMed Central journal article supplement (PMC4496617)

1 **Supplemental Material**

2

3 **Figure S1. Flow cytometry of nasal lavages.**

4 (A-D) Representative flow cytometry dot plots of nasal lavages from *S. pneumoniae*  
5 colonized WT (A and C) and *Il1r1*<sup>-/-</sup> (B and D) mice. Boxes indicate populations of  
6 neutrophils (Ly6G<sup>+</sup>, CD11b<sup>+</sup>) after 3 days of colonization (A and B) and  
7 monocytes/macrophages (F4/80<sup>+</sup>, CD11b<sup>-</sup>) at 14 (C and D) days of colonization.

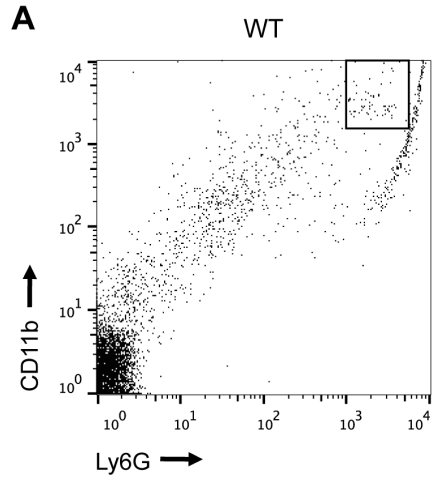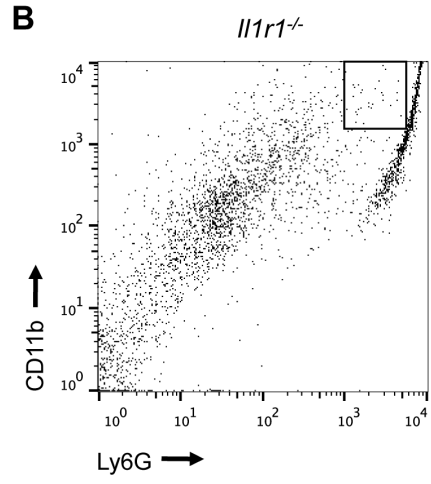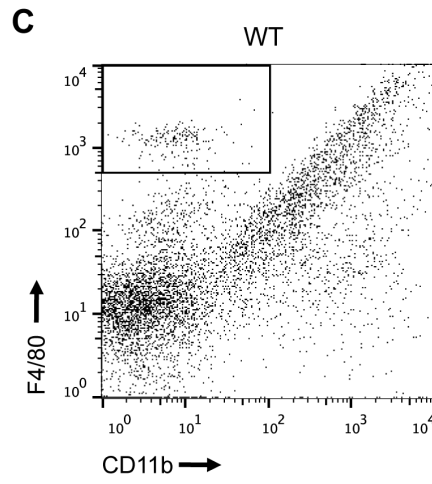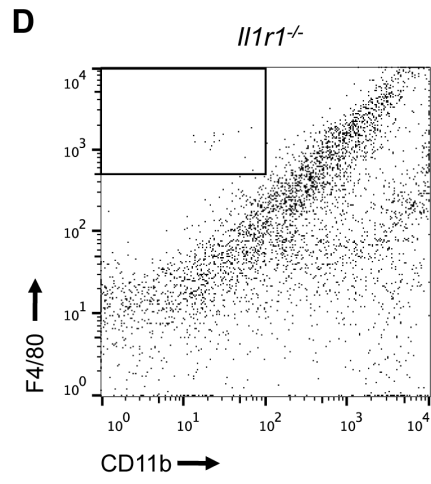

Supplement: IAI.00224-15_zii999091335so1.pdf [file IAI.00224-15_zii999091335so1.pdf]
